# Supplementary material
Source: PubMed Central journal article supplement (PMC9339146)
Supplement: jamaneurol-e222379-s002.pdf [file jamaneurol-e222379-s002.pdf]

\*First name, last name, and suffix (if applicable) are required and will appear in PubMed.

**\*Group Name(s): Pre-symptomatic Evaluation of Experimental or Novel Treatments for Alzheimer`s Disease (PREVENT-AD), Harvard Brain Aging Study (HABS), Australian Imaging, Biomarkers & Lifestyle Flagship Study of Ageing (AIBL)**

| *First Name and Middle Initial(s) | *Last Name     | *Suffix (eg, Jr, III) | Academic Degrees | Institution | Location (city, state/province, country) | Role or Contribution, eg, chair, principal investigator | Group (if more than 1 Group listed in the byline) and/or Subgroup (eg, Steering Committee) |
|-----------------------------------|----------------|-----------------------|------------------|-------------|------------------------------------------|---------------------------------------------------------|--------------------------------------------------------------------------------------------|
| Angela                            | Tam            |                       |                  |             |                                          |                                                         | PREVENT-AD                                                                                 |
| Anne                              | Labonte        |                       |                  |             |                                          |                                                         | PREVENT-AD                                                                                 |
| Alexa                             | Pichet Binette |                       |                  |             |                                          |                                                         | PREVENT-AD                                                                                 |
| Anne-Marie                        | Faubert        | Jr                    |                  |             |                                          |                                                         | PREVENT-AD                                                                                 |
| Axel                              | Mathieu        |                       |                  |             |                                          |                                                         | PREVENT-AD                                                                                 |
| Cecile                            | Madjar         |                       |                  |             |                                          |                                                         | PREVENT-AD                                                                                 |
| Charles Edouard                   | Carrier        |                       |                  |             |                                          |                                                         | PREVENT-AD                                                                                 |
| Christian                         | Dansereau      |                       |                  |             |                                          |                                                         | PREVENT-AD                                                                                 |
| Christina                         | Kazazian       |                       |                  |             |                                          |                                                         | PREVENT-AD                                                                                 |
| Claude                            | Lepage         |                       |                  |             |                                          |                                                         | PREVENT-AD                                                                                 |
| Cynthia                           | Picard         |                       |                  |             |                                          |                                                         | PREVENT-AD                                                                                 |
| David                             | Maillet        |                       |                  |             |                                          |                                                         | PREVENT-AD                                                                                 |
| Diane                             | Michaud        |                       |                  |             |                                          |                                                         | PREVENT-AD                                                                                 |
| Doris                             | Couture        |                       |                  |             |                                          |                                                         | PREVENT-AD                                                                                 |
| Doris                             | Dea            |                       |                  |             |                                          |                                                         | PREVENT-AD                                                                                 |
| Claudio                           | Cuello         |                       |                  |             |                                          |                                                         | PREVENT-AD                                                                                 |
| Alan                              | Barkun         |                       |                  |             |                                          |                                                         | PREVENT-AD                                                                                 |
| Alan                              | Evans          |                       |                  |             |                                          |                                                         | PREVENT-AD                                                                                 |
| Blandine                          | Courcot        |                       |                  |             |                                          |                                                         | PREVENT-AD                                                                                 |
| Christine                         | Tardif         |                       |                  |             |                                          |                                                         | PREVENT-AD                                                                                 |
| Clement                           | Debacker       |                       |                  |             |                                          |                                                         | PREVENT-AD                                                                                 |
| Clifford                          | Jack           |                       |                  |             |                                          |                                                         | PREVENT-AD                                                                                 |
| David                             | Fontaine       |                       |                  |             |                                          |                                                         | PREVENT-AD                                                                                 |
| David                             | Knopman        |                       |                  |             |                                          |                                                         | PREVENT-AD                                                                                 |
| Gerhard                           | Multhaup       |                       |                  |             |                                          |                                                         | PREVENT-AD                                                                                 |
| Jamie                             | Near           |                       |                  |             |                                          |                                                         | PREVENT-AD                                                                                 |
| Jeannie-Marie                     | Leoutsakos     |                       |                  |             |                                          |                                                         | PREVENT-AD                                                                                 |
| Jean-Robert                       | Maltais        |                       |                  |             |                                          |                                                         | PREVENT-AD                                                                                 |

## Supplemental Online Content: Nonauthor Collaborators

\*First name, last name, and suffix (if applicable) are required and will appear in PubMed.

| *First Name and Middle Initial(s) | *Last Name       | *Suffix (eg, Jr, III) | Academic Degrees | Institution | Location (city, state/province, country) | Role or Contribution, eg, chair, principal investigator | Group (if more than 1 Group listed in the byline) and/or Subgroup (eg, Steering Committee) |
|-----------------------------------|------------------|-----------------------|------------------|-------------|------------------------------------------|---------------------------------------------------------|--------------------------------------------------------------------------------------------|
| Jason                             | Brandt           |                       |                  |             |                                          |                                                         | PREVENT-AD                                                                                 |
| Jens                              | Pruessner        |                       |                  |             |                                          |                                                         | PREVENT-AD                                                                                 |
| John                              | Morris           |                       |                  |             |                                          |                                                         | PREVENT-AD                                                                                 |
| John                              | Breitner         |                       |                  |             |                                          |                                                         | PREVENT-AD                                                                                 |
| Judes                             | Poirier          |                       |                  |             |                                          |                                                         | PREVENT-AD                                                                                 |
| Laksanun                          | Cheewakriengkrai |                       |                  |             |                                          |                                                         | PREVENT-AD                                                                                 |
| Lisa-Marie                        | Münter           |                       |                  |             |                                          |                                                         | PREVENT-AD                                                                                 |
| Louis                             | Collins          |                       |                  |             |                                          |                                                         | PREVENT-AD                                                                                 |
| Mallar                            | Chakravarty      |                       |                  |             |                                          |                                                         | PREVENT-AD                                                                                 |
| Mark                              | Sager            |                       |                  |             |                                          |                                                         | PREVENT-AD                                                                                 |
| Marina                            | Dauar-Tedeschi   |                       |                  |             |                                          |                                                         | PREVENT-AD                                                                                 |
| Mark                              | Eisenberg        |                       |                  |             |                                          |                                                         | PREVENT-AD                                                                                 |
| Natasha                           | Rajah            |                       |                  |             |                                          |                                                         | PREVENT-AD                                                                                 |
| Paul                              | Aisen            |                       |                  |             |                                          |                                                         | PREVENT-AD                                                                                 |
| Paule-Joanne                      | Toussaint        |                       |                  |             |                                          |                                                         | PREVENT-AD                                                                                 |
| Pedro                             | Rosa-Neto        |                       |                  |             |                                          |                                                         | PREVENT-AD                                                                                 |
| Pierre                            | Bellec           |                       |                  |             |                                          |                                                         | PREVENT-AD                                                                                 |
| Penelope                          | Kostopoulos      |                       |                  |             |                                          |                                                         | PREVENT-AD                                                                                 |
| Pierre                            | Etienne          |                       |                  |             |                                          |                                                         | PREVENT-AD                                                                                 |
| Pierre                            | Tariot           |                       |                  |             |                                          |                                                         | PREVENT-AD                                                                                 |
| Pierre                            | Orban            |                       |                  |             |                                          |                                                         | PREVENT-AD                                                                                 |
| Reisa                             | Sperling         |                       |                  |             |                                          |                                                         | PREVENT-AD                                                                                 |
| Rick                              | Hoge             |                       |                  |             |                                          |                                                         | PREVENT-AD                                                                                 |
| Ronald                            | Thomas           |                       |                  |             |                                          |                                                         | PREVENT-AD                                                                                 |
| Serge                             | Gauthier         |                       |                  |             |                                          |                                                         | PREVENT-AD                                                                                 |
| Suzanne                           | Craft            |                       |                  |             |                                          |                                                         | PREVENT-AD                                                                                 |
| Sylvia                            | Villeneuve       |                       |                  |             |                                          |                                                         | PREVENT-AD                                                                                 |
| Thomas                            | Montine          |                       |                  |             |                                          |                                                         | PREVENT-AD                                                                                 |
| Vasavan                           | Nair             |                       |                  |             |                                          |                                                         | PREVENT-AD                                                                                 |
| Veronique                         | Bohbot           |                       |                  |             |                                          |                                                         | PREVENT-AD                                                                                 |
| Vinod                             | Venugopalan      |                       |                  |             |                                          |                                                         | PREVENT-AD                                                                                 |

## Supplemental Online Content: Nonauthor Collaborators

\*First name, last name, and suffix (if applicable) are required and will appear in PubMed.

| *First Name and Middle Initial(s) | *Last Name       | *Suffix (eg, Jr, III) | Academic Degrees | Institution | Location (city, state/province, country) | Role or Contribution, eg, chair, principal investigator | Group (if more than 1 Group listed in the byline) and/or Subgroup (eg, Steering Committee) |
|-----------------------------------|------------------|-----------------------|------------------|-------------|------------------------------------------|---------------------------------------------------------|--------------------------------------------------------------------------------------------|
| Vladimir                          | Fonov            |                       |                  |             |                                          |                                                         | PREVENT-AD                                                                                 |
| Yasser                            | Ituria-Medina    |                       |                  |             |                                          |                                                         | PREVENT-AD                                                                                 |
| Zaven                             | Khachaturian     |                       |                  |             |                                          |                                                         | PREVENT-AD                                                                                 |
| Eduard                            | Teigner          |                       |                  |             |                                          |                                                         | PREVENT-AD                                                                                 |
| Elena                             | Anthal           |                       |                  |             |                                          |                                                         | PREVENT-AD                                                                                 |
| Elsa                              | Yu               |                       |                  |             |                                          |                                                         | PREVENT-AD                                                                                 |
| Fabiola                           | Ferdinand        |                       |                  |             |                                          |                                                         | PREVENT-AD                                                                                 |
| Galina                            | Pogossova        |                       |                  |             |                                          |                                                         | PREVENT-AD                                                                                 |
| Ginette                           | Mayrand          |                       |                  |             |                                          |                                                         | PREVENT-AD                                                                                 |
| Guerda                            | Duclair          |                       |                  |             |                                          |                                                         | PREVENT-AD                                                                                 |
| Guylaine                          | Gagne            |                       |                  |             |                                          |                                                         | PREVENT-AD                                                                                 |
| Holly                             | Newbold-Fox      |                       |                  |             |                                          |                                                         | PREVENT-AD                                                                                 |
| Illana                            | Leppert          |                       |                  |             |                                          |                                                         | PREVENT-AD                                                                                 |
| Isabelle                          | Vallee           |                       |                  |             |                                          |                                                         | PREVENT-AD                                                                                 |
| Jacob                             | Vogel            |                       |                  |             |                                          |                                                         | PREVENT-AD                                                                                 |
| Jennifer                          | Tremblay-Mercier |                       |                  |             |                                          |                                                         | PREVENT-AD                                                                                 |
| Joanne                            | Frenette         |                       |                  |             |                                          |                                                         | PREVENT-AD                                                                                 |
| Josee                             | Frappier         |                       |                  |             |                                          |                                                         | PREVENT-AD                                                                                 |
| Justin                            | Kat              |                       |                  |             |                                          |                                                         | PREVENT-AD                                                                                 |
| Justin                            | Miron            |                       |                  |             |                                          |                                                         | PREVENT-AD                                                                                 |
| Karen                             | Wan              |                       |                  |             |                                          |                                                         | PREVENT-AD                                                                                 |
| Laura                             | Mahar            |                       |                  |             |                                          |                                                         | PREVENT-AD                                                                                 |
| Leopoldina                        | Carmo            |                       |                  |             |                                          |                                                         | PREVENT-AD                                                                                 |
| Louise                            | Theroux          |                       |                  |             |                                          |                                                         | PREVENT-AD                                                                                 |
| Mahsa                             | Dadar            |                       |                  |             |                                          |                                                         | PREVENT-AD                                                                                 |
| Marianne                          | Dufour           |                       |                  |             |                                          |                                                         | PREVENT-AD                                                                                 |
| Marie-Elyse                       | Lafaille-Magnan  |                       |                  |             |                                          |                                                         | PREVENT-AD                                                                                 |
| Melissa                           | Appleby          |                       |                  |             |                                          |                                                         | PREVENT-AD                                                                                 |
| Melissa                           | Savard           |                       |                  |             |                                          |                                                         | PREVENT-AD                                                                                 |
| Miranda                           | Tuwaig           |                       |                  |             |                                          |                                                         | PREVENT-AD                                                                                 |
| Mirela                            | Petkova          |                       |                  |             |                                          |                                                         | PREVENT-AD                                                                                 |

## Supplemental Online Content: Nonauthor Collaborators

\*First name, last name, and suffix (if applicable) are required and will appear in PubMed.

| *First Name and Middle Initial(s) | *Last Name      | *Suffix (eg, Jr, III) | Academic Degrees | Institution | Location (city, state/province, country) | Role or Contribution, eg, chair, principal investigator | Group (if more than 1 Group listed in the byline) and/or Subgroup (eg, Steering Committee) |
|-----------------------------------|-----------------|-----------------------|------------------|-------------|------------------------------------------|---------------------------------------------------------|--------------------------------------------------------------------------------------------|
| Pierre                            | Rioux           |                       |                  |             |                                          |                                                         | PREVENT-AD                                                                                 |
| Pierre-François                   | Meyer           |                       |                  |             |                                          |                                                         | PREVENT-AD                                                                                 |
| Rana                              | El-Khoury       |                       |                  |             |                                          |                                                         | PREVENT-AD                                                                                 |
| Renee                             | Gordon          |                       |                  |             |                                          |                                                         | PREVENT-AD                                                                                 |
| Renuka                            | Giles           |                       |                  |             |                                          |                                                         | PREVENT-AD                                                                                 |
| Samir                             | Das             |                       |                  |             |                                          |                                                         | PREVENT-AD                                                                                 |
| Seqian                            | Wang            |                       |                  |             |                                          |                                                         | PREVENT-AD                                                                                 |
| Shirin                            | Tabrizi         |                       |                  |             |                                          |                                                         | PREVENT-AD                                                                                 |
| Sulantha                          | Mathotaarachchi |                       |                  |             |                                          |                                                         | PREVENT-AD                                                                                 |
| Sylvie                            | Dubuc           |                       |                  |             |                                          |                                                         | PREVENT-AD                                                                                 |
| Tanya                             | Lee             |                       |                  |             |                                          |                                                         | PREVENT-AD                                                                                 |
| Thomas                            | Beaudry         |                       |                  |             |                                          |                                                         | PREVENT-AD                                                                                 |
| Valerie                           | Gervais         |                       |                  |             |                                          |                                                         | PREVENT-AD                                                                                 |
| Veronique                         | Page            |                       |                  |             |                                          |                                                         | PREVENT-AD                                                                                 |
| Julie                             | Gonneaud        |                       |                  |             |                                          |                                                         | PREVENT-AD                                                                                 |
| G lebru                           | Ayranci         |                       |                  |             |                                          |                                                         | PREVENT-AD                                                                                 |
| Tharick                           | Pascoal         |                       |                  |             |                                          |                                                         | PREVENT-AD                                                                                 |
| Rene                              | Desautels       |                       |                  |             |                                          |                                                         | PREVENT-AD                                                                                 |
| Fatiha                            | Benbouhoud      |                       |                  |             |                                          |                                                         | PREVENT-AD                                                                                 |
| Eunice Farah                      | Saint-Fort      |                       |                  |             |                                          |                                                         | PREVENT-AD                                                                                 |
| Sander                            | Verfaillie      |                       |                  |             |                                          |                                                         | PREVENT-AD                                                                                 |
| Sarah                             | Farzin          |                       |                  |             |                                          |                                                         | PREVENT-AD                                                                                 |
| Alyssa                            | Salaciak        |                       |                  |             |                                          |                                                         | PREVENT-AD                                                                                 |
| Stephanie                         | Tullo           |                       |                  |             |                                          |                                                         | PREVENT-AD                                                                                 |
| Etienne                           | Vachon-Presseau |                       |                  |             |                                          |                                                         | PREVENT-AD                                                                                 |
| Leslie-Ann                        | Daoust          |                       |                  |             |                                          |                                                         | PREVENT-AD                                                                                 |
| Theresa                           | Kobe            |                       |                  |             |                                          |                                                         | PREVENT-AD                                                                                 |
| Nathan                            | Spreng          |                       |                  |             |                                          |                                                         | PREVENT-AD                                                                                 |
| Melissa                           | McSweeney       |                       |                  |             |                                          |                                                         | PREVENT-AD                                                                                 |
| Nathalie                          | Nilsson         |                       |                  |             |                                          |                                                         | PREVENT-AD                                                                                 |
| Morteza                           | Pishnamazi      |                       |                  |             |                                          |                                                         | PREVENT-AD                                                                                 |

## Supplemental Online Content: Nonauthor Collaborators

\*First name, last name, and suffix (if applicable) are required and will appear in PubMed.

| *First Name and Middle Initial(s) | *Last Name        | *Suffix (eg, Jr, III) | Academic Degrees | Institution | Location (city, state/province, country) | Role or Contribution, eg, chair, principal investigator | Group (if more than 1 Group listed in the byline) and/or Subgroup (eg, Steering Committee) |
|-----------------------------------|-------------------|-----------------------|------------------|-------------|------------------------------------------|---------------------------------------------------------|--------------------------------------------------------------------------------------------|
| Christophe                        | Bedetti           |                       |                  |             |                                          |                                                         | PREVENT-AD                                                                                 |
| Louise                            | Hudon             |                       |                  |             |                                          |                                                         | PREVENT-AD                                                                                 |
| Claudia                           | Greco             |                       |                  |             |                                          |                                                         | PREVENT-AD                                                                                 |
| Marianne                          | Chapleau          |                       |                  |             |                                          |                                                         | PREVENT-AD                                                                                 |
| Frederic                          | St-Onge           |                       |                  |             |                                          |                                                         | PREVENT-AD                                                                                 |
| Sophie                            | Boutin            |                       |                  |             |                                          |                                                         | PREVENT-AD                                                                                 |
| Maiya                             | Geddes            |                       |                  |             |                                          |                                                         | PREVENT-AD                                                                                 |
| Simon                             | Ducharme          |                       |                  |             |                                          |                                                         | PREVENT-AD                                                                                 |
| Gabriel                           | Jean              |                       |                  |             |                                          |                                                         | PREVENT-AD                                                                                 |
| Elisabeth                         | Sylvain           |                       |                  |             |                                          |                                                         | PREVENT-AD                                                                                 |
| Marie-Josée                       | Ã%olie            |                       |                  |             |                                          |                                                         | PREVENT-AD                                                                                 |
| Gloria                            | Leblond-Baccichet |                       |                  |             |                                          |                                                         | PREVENT-AD                                                                                 |
| Jean-Paul                         | Soucy             |                       |                  |             |                                          |                                                         | PREVENT-AD                                                                                 |
| Hazal                             | Ozlen             |                       |                  |             |                                          |                                                         | PREVENT-AD                                                                                 |
| Julie                             | Bailly            |                       |                  |             |                                          |                                                         | PREVENT-AD                                                                                 |
| Bery                              | Mohammediyani     |                       |                  |             |                                          |                                                         | PREVENT-AD                                                                                 |
| Yalin                             | Chen              |                       |                  |             |                                          |                                                         | PREVENT-AD                                                                                 |
| Jordana                           | Remz              |                       |                  |             |                                          |                                                         | PREVENT-AD                                                                                 |
| Jean-Paul                         | Soucy             |                       |                  |             |                                          |                                                         | PREVENT-AD                                                                                 |
| Reisa                             | Sperling          |                       |                  |             |                                          |                                                         | HABS                                                                                       |
| Keith                             | Johnson           |                       |                  |             |                                          |                                                         | HABS                                                                                       |
| Dorene                            | Rentz             |                       |                  |             |                                          |                                                         | HABS                                                                                       |
| Rebecca E.                        | Amariglio         |                       |                  |             |                                          |                                                         | HABS                                                                                       |
| Deborah                           | Blacker           |                       |                  |             |                                          |                                                         | HABS                                                                                       |
| Rachel                            | Buckley           |                       |                  |             |                                          |                                                         | HABS                                                                                       |
| Jasmeer P.                        | Chhatwal          |                       |                  |             |                                          |                                                         | HABS                                                                                       |
| Brad                              | Dickerson         |                       |                  |             |                                          |                                                         | HABS                                                                                       |
| Nancy                             | Donovan           |                       |                  |             |                                          |                                                         | HABS                                                                                       |
| Michelle                          | Farrell           |                       |                  |             |                                          |                                                         | HABS                                                                                       |
| Geoffroy                          | Gagliardi         |                       |                  |             |                                          |                                                         | HABS                                                                                       |
| Jennifer                          | Gatchel           |                       |                  |             |                                          |                                                         | HABS                                                                                       |

## Supplemental Online Content: Nonauthor Collaborators

\*First name, last name, and suffix (if applicable) are required and will appear in PubMed.

| *First Name and Middle Initial(s) | *Last Name       | *Suffix (eg, Jr, III) | Academic Degrees | Institution                                                     | Location (city, state/province, country) | Role or Contribution, eg, chair, principal investigator | Group (if more than 1 Group listed in the byline) and/or Subgroup (eg, Steering Committee) |
|-----------------------------------|------------------|-----------------------|------------------|-----------------------------------------------------------------|------------------------------------------|---------------------------------------------------------|--------------------------------------------------------------------------------------------|
| Edmarie                           | Guzman-Velez     |                       |                  |                                                                 |                                          |                                                         | HABS                                                                                       |
| Heidi                             | Jacobs           |                       |                  |                                                                 |                                          |                                                         | HABS                                                                                       |
| Roos                              | Jutten           |                       |                  |                                                                 |                                          |                                                         | HABS                                                                                       |
| Cristina                          | Lois Gomez       |                       |                  |                                                                 |                                          |                                                         | HABS                                                                                       |
| Gad                               | Marshall         |                       |                  |                                                                 |                                          |                                                         | HABS                                                                                       |
| Kate                              | Oaoo             |                       |                  |                                                                 |                                          |                                                         | HABS                                                                                       |
| Enmanuelle                        | Pardilla-Delgado |                       |                  |                                                                 |                                          |                                                         | HABS                                                                                       |
| Julie                             | Price            |                       |                  |                                                                 |                                          |                                                         | HABS                                                                                       |
| Prokopis                          | Prokopiou        |                       |                  |                                                                 |                                          |                                                         | HABS                                                                                       |
| Yakeel                            | Quiroz           |                       |                  |                                                                 |                                          |                                                         | HABS                                                                                       |
| Gretchen                          | Reynolds         |                       |                  |                                                                 |                                          |                                                         | HABS                                                                                       |
| Aaron                             | Schultz          |                       |                  |                                                                 |                                          |                                                         | HABS                                                                                       |
| Stephanie                         | Schultz          |                       |                  |                                                                 |                                          |                                                         | HABS                                                                                       |
| Jorge                             | Sepulcre         |                       |                  |                                                                 |                                          |                                                         | HABS                                                                                       |
| Irina                             | Skylar-Scott     |                       |                  |                                                                 |                                          |                                                         | HABS                                                                                       |
| Patrizia                          | Vannini          |                       |                  |                                                                 |                                          |                                                         | HABS                                                                                       |
| Clara                             | Vila-Castelar    |                       |                  |                                                                 |                                          |                                                         | HABS                                                                                       |
| Hyun-Sik                          | Yang             |                       |                  |                                                                 |                                          |                                                         | HABS                                                                                       |
| Colin L                           | Masters          |                       | PhD              | Florey Institute of Neuroscience and Mental Health              | Melbourne, Victoria, Australia           | Chair                                                   | AIBL                                                                                       |
| Larry                             | Ward             |                       | PhD              | Florey Institute of Neuroscience and Mental Health              | Melbourne, Victoria, Australia           | Investigator                                            | AIBL                                                                                       |
| Paul                              | Maruff           |                       | PhD              | Cogstate and Florey Institute of Neuroscience and Mental Health | Melbourne, Victoria, Australia           | Investigator                                            | AIBL                                                                                       |
| Christopher                       | Fowler           |                       | PhD              | Florey Institute of Neuroscience and Mental Health              | Melbourne, Victoria, Australia           | AIBL study manager, Melbourne                           | AIBL                                                                                       |

## Supplemental Online Content: Nonauthor Collaborators

\*First name, last name, and suffix (if applicable) are required and will appear in PubMed.

| <b>*First Name and Middle Initial(s)</b> | <b>*Last Name</b> | <b>*Suffix (eg, Jr, III)</b> | Academic Degrees | Institution            | Location (city, state/province, country) | Role or Contribution, eg, chair, principal investigator | Group (if more than 1 Group listed in the byline) and/or Subgroup (eg, Steering Committee) |
|------------------------------------------|-------------------|------------------------------|------------------|------------------------|------------------------------------------|---------------------------------------------------------|--------------------------------------------------------------------------------------------|
| Ralph                                    | Martins           |                              | PhD              | Edith Cowan University | Perth, Western Australia, Australia      | Deputy Chair                                            | AIBL                                                                                       |
| Stephanie                                | Rainy-Smith       |                              | PhD              | Edith Cowan University | Perth, Western Australia, Australia      | AIBL study manager, Perth                               | AIBL                                                                                       |
| Kevin                                    | Taddei            |                              | PhD              | Edith Cowan University | Perth, Western Australia, Australia      | Investigator                                            | AIBL                                                                                       |
| Belinda                                  | Brown             |                              | PhD              | Murdoch University     | Perth, Western Australia, Australia      | Investgator                                             | AIBL                                                                                       |
| Simon                                    | Laws              |                              | PhD              | Edith Cowan University | Perth, Western Australia, Australia      | Investigator                                            | AIBL                                                                                       |
| Jurgen                                   | Frapp             |                              | PhD              | CSIRO                  | Brisbane, Queensland, Australia          | Investigator                                            | AIBL                                                                                       |
| Pierrick                                 | Bourgeat          |                              | PhD              | CSIRO                  | Brisbane, Queensland, Australia          | Investigator                                            | AIBL                                                                                       |
